# Supplementary material for: Tenascin-C: Friend or Foe in Lung Aging?
Source: PubMed Central journal article supplement (PMC8578707; doi:10.3389/fphys.2021.749776), 2021-10-27
Supplement: Image_1.pdf [file Image_1.pdf]

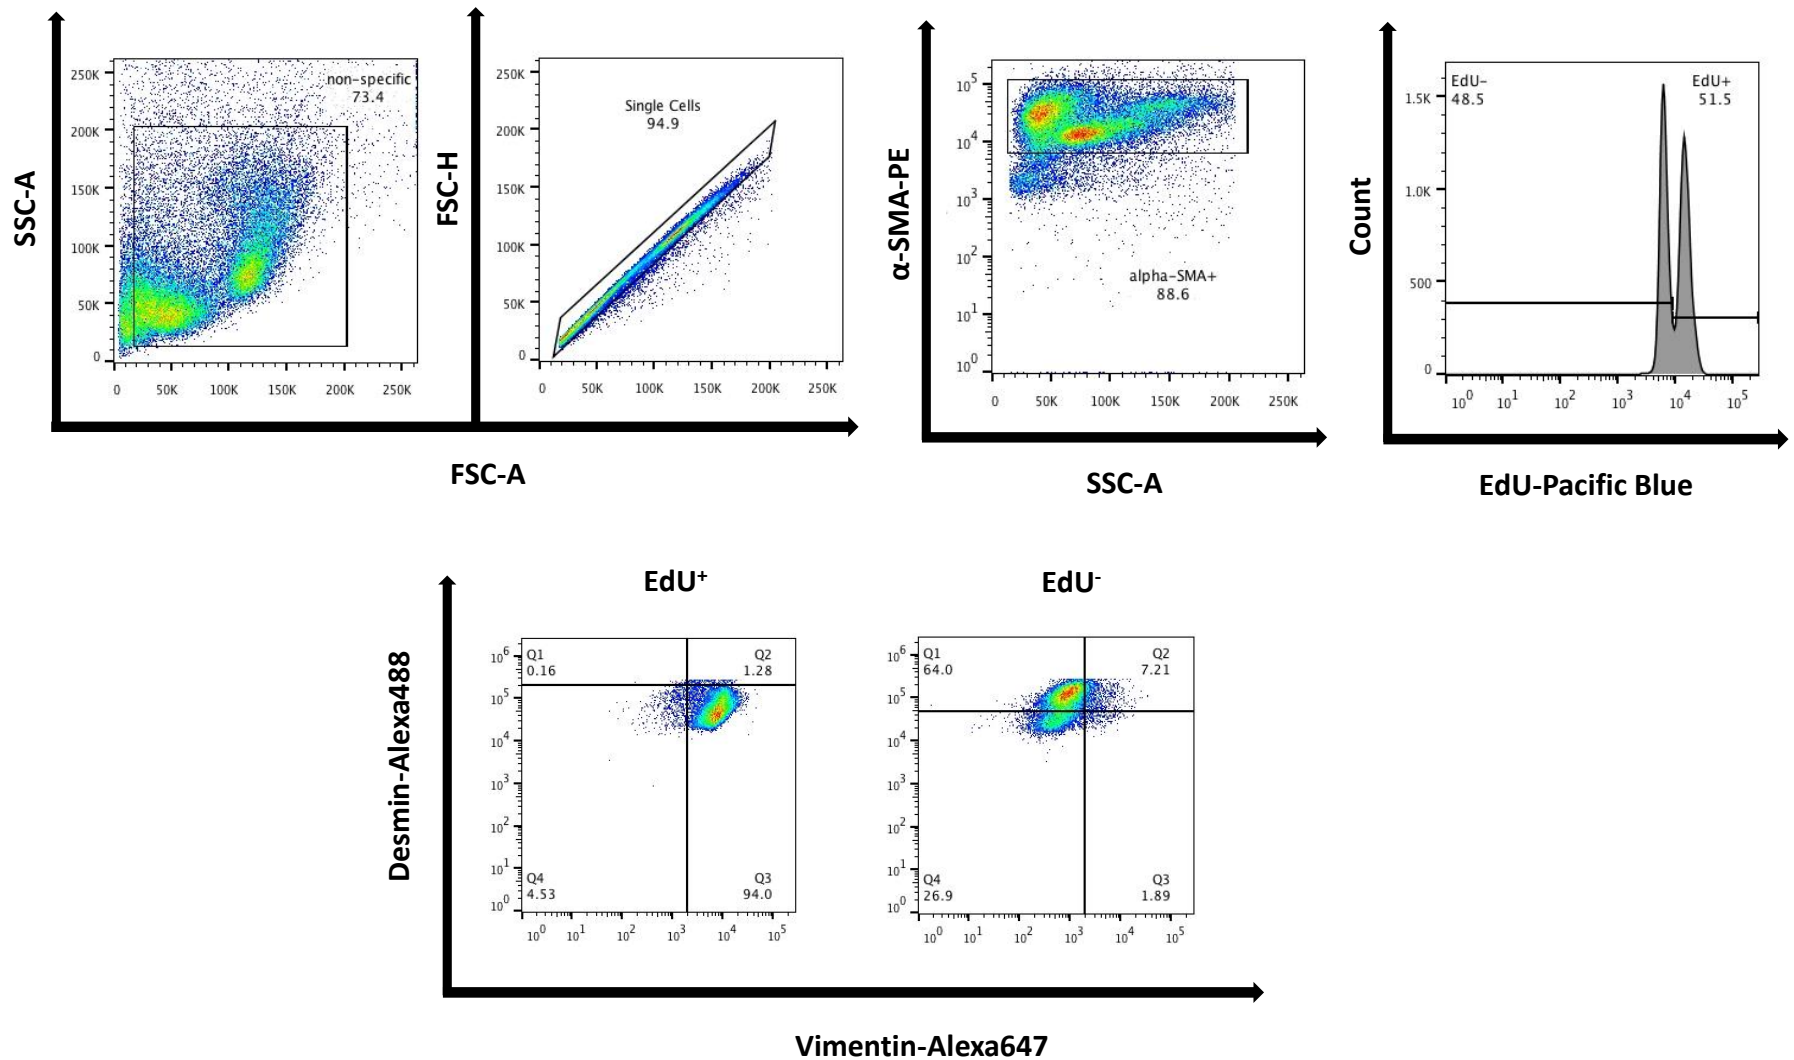

**Supplementary Figure 1: Flow cytometry gating strategy.** A representative gating strategy of the cellular characterization from mouse lung homogenates is depicted. Initially, dead cells were gated out *via* size exclusion (FSC-A vs SSC-A) and single cells were selected (FSC-A vs FSC-H). Cells that express  $\alpha$ -SMA ( $\alpha$ -SMA vs SSC-A) were selected and proliferation levels were measured. The two distinct peaks (EdU-Pacific Blue) discriminates proliferative cells (EdU<sup>+</sup>) from non-proliferative cells (EdU<sup>-</sup>). Then the two distinct populations were analyzed for Myofibroblasts ( $\alpha$ -SMA<sup>+</sup>/Vimentin<sup>+</sup>/Desmin<sup>-</sup>) and SM cells ( $\alpha$ -SMA<sup>+</sup>/Vimentin<sup>-</sup>/Desmin<sup>+</sup>).
