# Supplementary material for: Tenascin-C: Friend or Foe in Lung Aging?
Source: PubMed Central journal article supplement (PMC8578707; doi:10.3389/fphys.2021.749776), 2021-10-27
Supplement: Image_2.pdf [file Image_2.pdf]

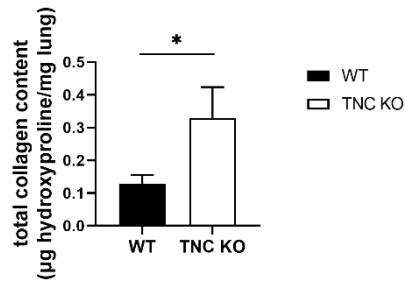

**Supplementary Figure 2: Total collagen content was doubled in TNC KO lungs.**

Total collagen content was measured by the hydroxyproline assay, starting from frozen lungs. N=3 animals/genotype. Results are expressed as mean  $\pm$  SD. Statistical analysis was made by Student's t test; statistical significance was set at  $p < 0.05$ ; \*  $p < 0.05$ .
