# Supplementary material for: Tenascin-C: Friend or Foe in Lung Aging?
Source: PubMed Central journal article supplement (PMC8578707; doi:10.3389/fphys.2021.749776), 2021-10-27
Supplement: Table_1.pdf [file Table_1.pdf]

**Supplementary Table I: Primers panel for RT-qPCR.**

|                  | <b>forward</b>                        | <b>reverse</b>                    |
|------------------|---------------------------------------|-----------------------------------|
| <b>TGFβ1</b>     | 5'-CTG CTG ACC CCC ACT GAT AC-3'      | 5'-AGC CCT GTA TTC CGT CTC CT-3'  |
| <b>TGFβR1</b>    | 5'-GCA TTG GCA AAG GTC GGT TT-3'      | 5'-TGC CTC TCG GAA CCA TGA AC-3'  |
| <b>TGFβR2</b>    | 5'-GTG AGA CTG TCC ACT TGC GA-3'      | 5'-TGT CGT TCT TCC TCC ACA CG-3'  |
| <b>TGFβR3</b>    | 5'-CTG CCA AGG GAG GTT CAC AT-3'      | 5'-AGC AGG AAC ACA ACA GGC TT-3'  |
| <b>TLR4</b>      | 5'-AGC CGG AAG GTT ATT GTG GT-3'      | 5'-CAG CAG GGA CTT CTC AAC CT-3'  |
| <b>MyD88</b>     | 5'-CCG CCT ATC GCT GTT CTT GA-3'      | 5'-CCA GGC ATC CAA CAA ACT GC-3'  |
| <b>ki67</b>      | 5'-ATT GAC CGC TCC TTT AGG TAT GAA-3' | 5'-TTG ACC TTC CCC ATC AGG GTC-3' |
| <b>PCNA</b>      | 5'-TCG TCT CAC GTC TCC TTG GT-3'      | 5'-TTT TGG ACA TGC TGG TGA GGT-3' |
| <b>cyclin D1</b> | 5'-CAA AAT GCC AGA GGC GGA TG-3'      | 5'-CAT GGA GGG TGG GTT GGA AA-3'  |
| <b>p27kip1</b>   | 5'-AGT TCT ACT ACA GGC CCC CG-3'      | 5'-CCA ATT AAA GGC ACC GCC TG-3'  |
| <b>Bcl-2</b>     | 5'-GAC AAC ATC GCC CTG TGG AT-3'      | 5'-AGC CCA GAC TCA TTC AAC CA-3'  |
| <b>Bcl-xL</b>    | 5'-CGG ATT GCA AGT TGG ATG GC-3'      | 5'-TGC TGC ATT GTT CCC GTA GA-3'  |
